# Supplementary material
Source: Springer Nature journal article supplement (https://www.springermedizin.de/resource/supplementary/12955_2005_196_MOESM2_ESM.pdf/9559876)

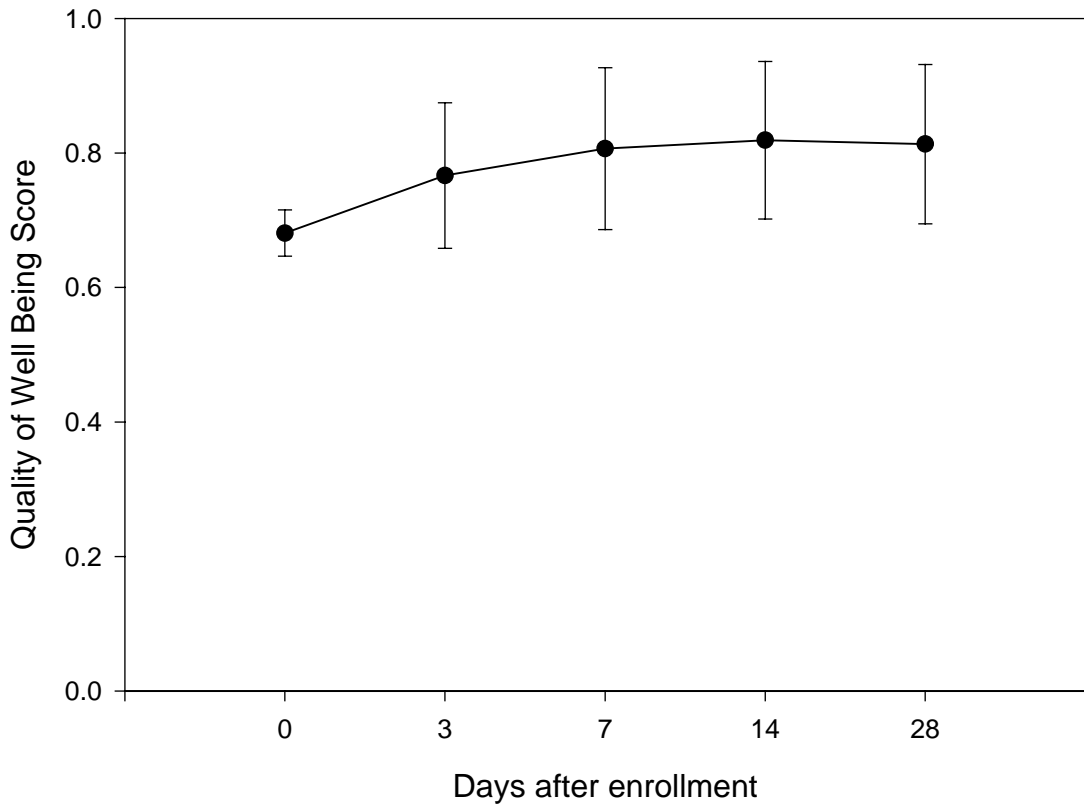

Supplement: MOESM2 [file 9559876]
